# Supplementary material
Source: PubMed Central journal article supplement (PMC5733728)
Supplement: NIHMS923191-supplement-supplemental_data.pdf [file NIHMS923191-supplement-supplemental_data.pdf]

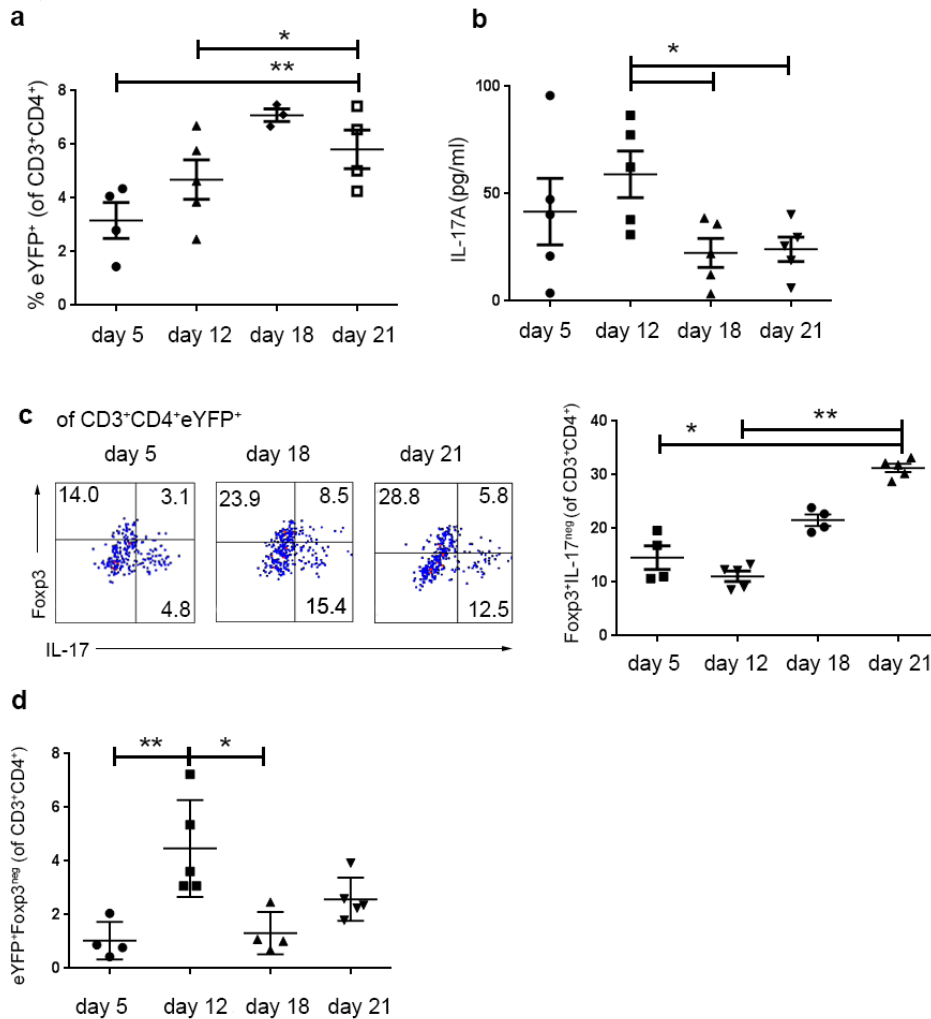

**Supplementary Figure 1. Th17 cells transdifferentiate into *Foxp3*<sup>+</sup> *exTh17* cells in tumor-bearing mice.** MC38 cells were injected in IL17a<sup>Cre</sup>R26R<sup>ReYFP</sup> fate reporter mice. Splenocytes were recovered at different time points ( $n = 4$  mice per group) of tumor progression and CD4<sup>+</sup> T cells assessed for eYFP expression (a), IL-17 production (b) and eYFP<sup>+</sup> cells analyzed for IL-17 production and Foxp3 expression (c,d) by flow cytometry. (a) We observed accumulation of eYFP<sup>+</sup> cells (indicative of Th17 and/or exTh17 cells) over time. (b) IL-17 production, as determined by ELISA, showed a decline in IL-17 cytokine after the initial induction. (c) The percentages of Foxp3<sup>+</sup>IL-17<sup>neg</sup> (i.e. exTh17 T<sub>reg</sub>) cells increased in these mice with tumor progression, which matched with the reduction of the percentage of eYFP<sup>+</sup> cells not expressing Foxp3 (c). All data are mean  $\pm$  s.d. \* $P < 0.05$  and \*\* $P < 0.01$  by two-tailed Student's  $t$  test. Similar results were obtained in an additional independent experiment.

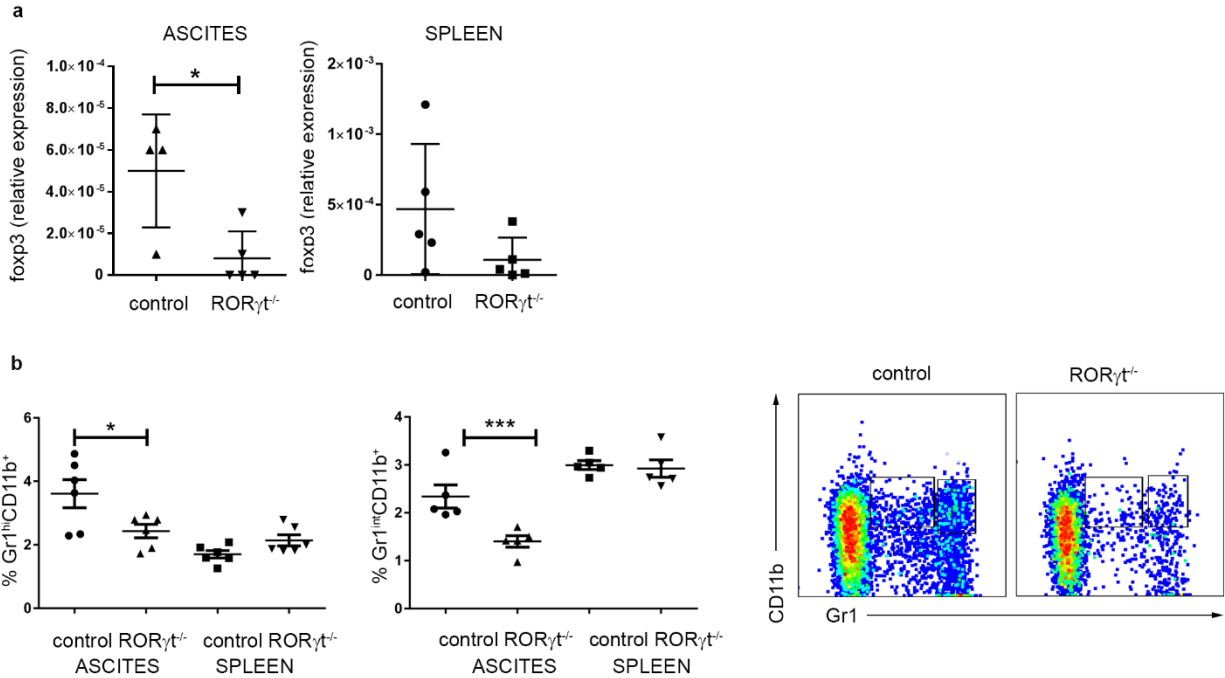

**Supplementary Figure 2. ROR $\gamma$ t<sup>-/-</sup> mice demonstrate reduced infiltration of Foxp3<sup>+</sup> T<sub>reg</sub> cells and MDSCs in tumor microenvironment.** ID8 cells ( $4 \times 10^6$  per mouse) were injected in ROR $\gamma$ t<sup>-/-</sup> mice. Ascites-infiltrating cells and splenocytes were isolated on day  $35 \pm 2$  ( $n = 5$  mice per group) of tumor progression (a) Foxp3 expression in the TALs and spleens was determined on day  $35 \pm 2$ . (b) Statistical analysis (left) and the representative staining (right) of Gr1<sup>hi/int</sup>CD11b<sup>+</sup> cells in the tumor ascites and spleens from  $n = 5$  mice. All data are mean  $\pm$  s.d. \* $P < 0.05$ , \*\* $P < 0.01$  by two-tailed Student's  $t$  test.

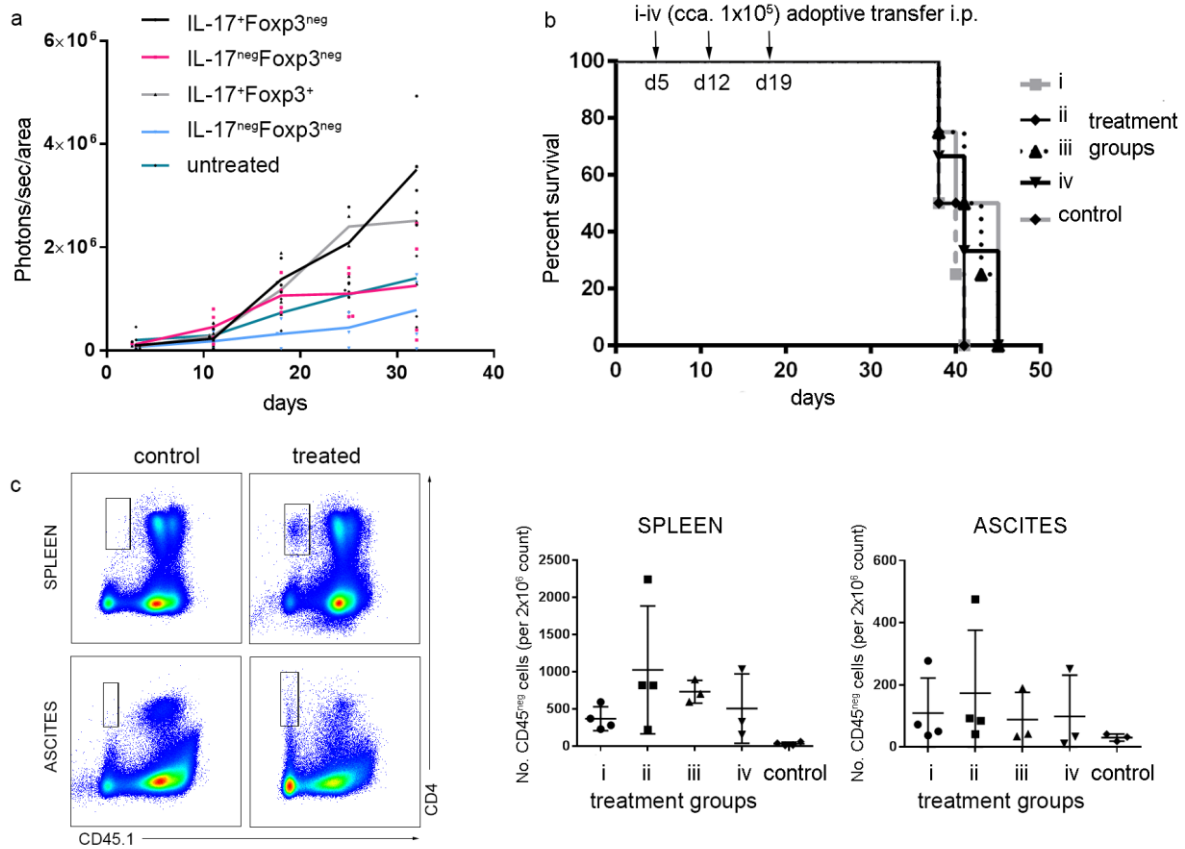

**Supplementary Figure 3. Adoptively transferred Foxp3<sup>neg/+</sup>IL-17<sup>neg/+</sup> T cells do not significantly alter the survival of ID8A tumor-bearing mice.** CD4<sup>+</sup> T cells from Foxp3<sup>GFP</sup> reporter mice were cultured under Th17 (IL-6, IL-23, TGF- $\beta$ , 3 days)/T<sub>reg</sub> (TGF- $\beta$ , +1 day) - driving conditions. Foxp3<sup>neg</sup>IL-17<sup>+</sup> (i), Foxp3<sup>+</sup>IL-17<sup>+</sup> (ii), Foxp3<sup>neg</sup>IL-17<sup>neg</sup> (iii) and Foxp3<sup>+</sup>IL-17<sup>neg</sup> (iv) CD3<sup>+</sup> T cells were sorted and injected i.p. into ID8-tumor bearing mice as outlined in **Fig. 3a**. **(a,b)** Th17-T<sub>reg</sub> subsets (i-iv) were injected i.p. into ID8A-luc tumor-bearing Cd45.1 mice on days 5, 12 and 19 and the mice monitored for tumor progression **(a)** and survival **(b)**, weight increase >140%, lethargic behavior). **(c)** CD4<sup>+</sup>CD45.1<sup>neg</sup> cells from ID8A-luc tumor-bearing Cd45.1 mice, receiving adoptively transferred Th17-T<sub>reg</sub> subsets (groups i-iv,  $n = 4$  mice per group), were analyzed on day 40 $\pm$ 1. Representative staining (*left*) and the numbers of CD4<sup>+</sup>CD45.1<sup>neg</sup> cells (*right*) in each group of mice.

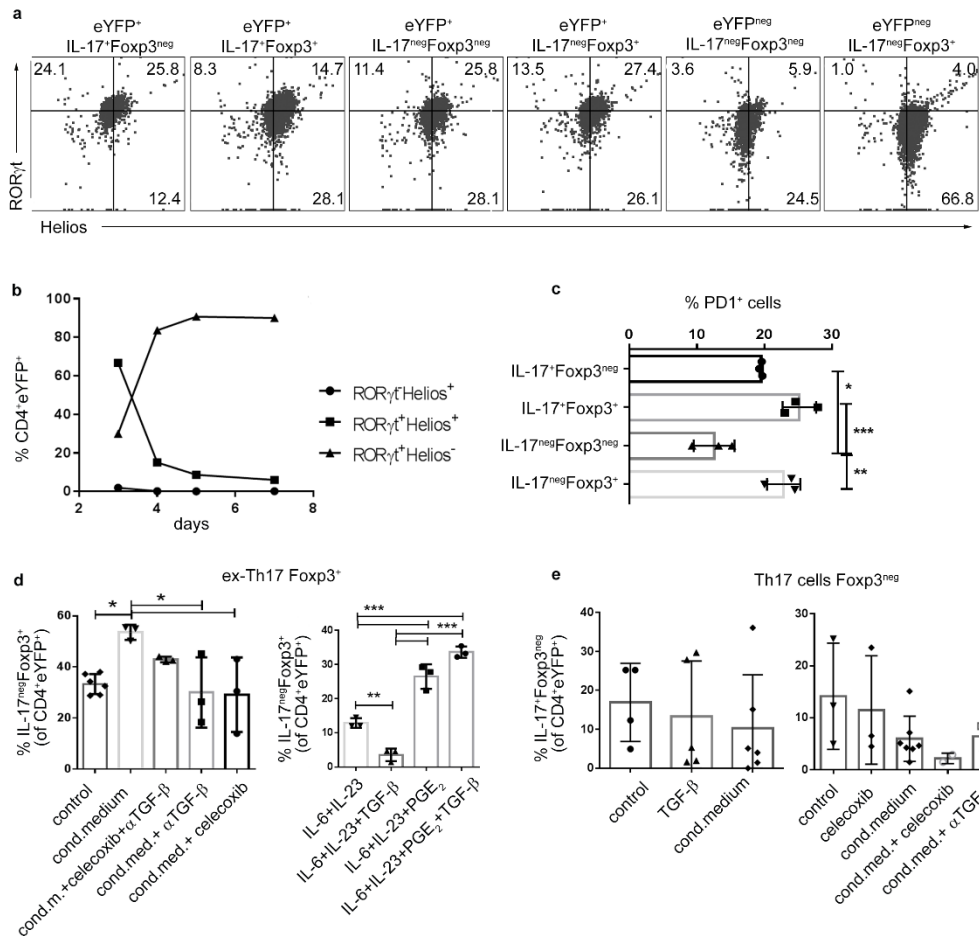

**Supplementary Figure 4. Characteristics of Th17 into ex-Th17 Foxp3<sup>+</sup>IL-17<sup>neg</sup> cells-transdifferentiation.** (a) YFP<sup>+</sup>Foxp3<sup>neg</sup>IL-17<sup>+</sup>, YFP<sup>+</sup>Foxp3<sup>+</sup>IL-17<sup>+</sup>, YFP<sup>+</sup>Foxp3<sup>neg</sup>IL-17<sup>neg</sup>, YFP<sup>+</sup>Foxp3<sup>+</sup>IL-17<sup>neg</sup> and YFP<sup>neg</sup>Foxp3<sup>neg</sup>IL-17<sup>neg</sup>, YFP<sup>+</sup>Foxp3<sup>neg</sup>IL-17<sup>neg</sup> CD3<sup>+</sup> T cells were sorted using the strategy presented in Fig. 4e and analyzed for RORγt and Helios expression by flow cytometry. Similar data was obtained in an additional independent experiments. (b) Representative flow cytometry analysis of time-dependent induction of Helios and RORγt in eYFP<sup>+</sup> cells from Il17a<sup>Cre</sup>R26R<sup>eYFP</sup> fate reporter mice (CD4<sup>+</sup> gated). Cells were cultured in the presence of Th17 (IL-6, IL-23 and TGF-β)- driving conditions and analyzed on days 3, 4, 5 and 7 by flow cytometry for the expression of Helios and RORγt by eYFP<sup>+</sup> cells. Similar data was obtained in an additional independent experiments. (c) Foxp3<sup>neg</sup>IL-17<sup>+</sup>, Foxp3<sup>+</sup>IL-17<sup>+</sup>, Foxp3<sup>neg</sup>IL-17<sup>neg</sup> and Foxp3<sup>+</sup>IL-17<sup>neg</sup> CD3<sup>+</sup> T cells were sorted using the strategy presented in Fig. 3a and analyzed by flow cytometry for PD1 expression. Aggregate data of 3 independent experiments is shown as mean ± sd. (d) CD4<sup>+</sup> T cells from IL-17a<sup>Cre</sup>R26R<sup>ReYFP</sup> reporter mice were cultured in conditioned medium of ID8A cells (mean ± sd, left) and analyzed for the percentage of IL-17<sup>neg</sup>Foxp3<sup>+</sup> cells of YFP<sup>+</sup>CD4<sup>+</sup> cells. COX2 inhibitor celecoxib was added during preparation of conditioned medium and celecoxib and TGF-β blocking antibody were added to cell cultures during CD3/CD28 stimulation. CD4<sup>+</sup> T cells from IL-17a<sup>Cre</sup>R26R<sup>ReYFP</sup> reporter mice were cultured in the presence of cytokines IL-6, IL-23, TGF-β and PGE<sub>2</sub> as indicated (mean ± sd, right). Similar data was obtained in an additional independent experiments. (e) CD4<sup>+</sup> T cells from IL-17a<sup>Cre</sup>R26R<sup>ReYFP</sup> reporter mice were cultured under T<sub>reg</sub>-driving conditions (TGF-β or conditioned medium of ID8A cells) and analyzed for the percentage of IL-17<sup>+</sup>Foxp3<sup>neg</sup> cells of YFP<sup>+</sup>CD4<sup>+</sup> cells (mean ± sd, left). COX2 inhibitor celecoxib was added during preparation of conditioned medium and celecoxib and TGF-β blocking antibody

were added to cell cultures during CD3/CD28 stimulation, *right*). Similar data was obtained in an additional independent experiments. \* $P < 0.05$ , \*\* $P < 0.01$  and \*\*\* $P < 0.001$  by one-way ANOVA.

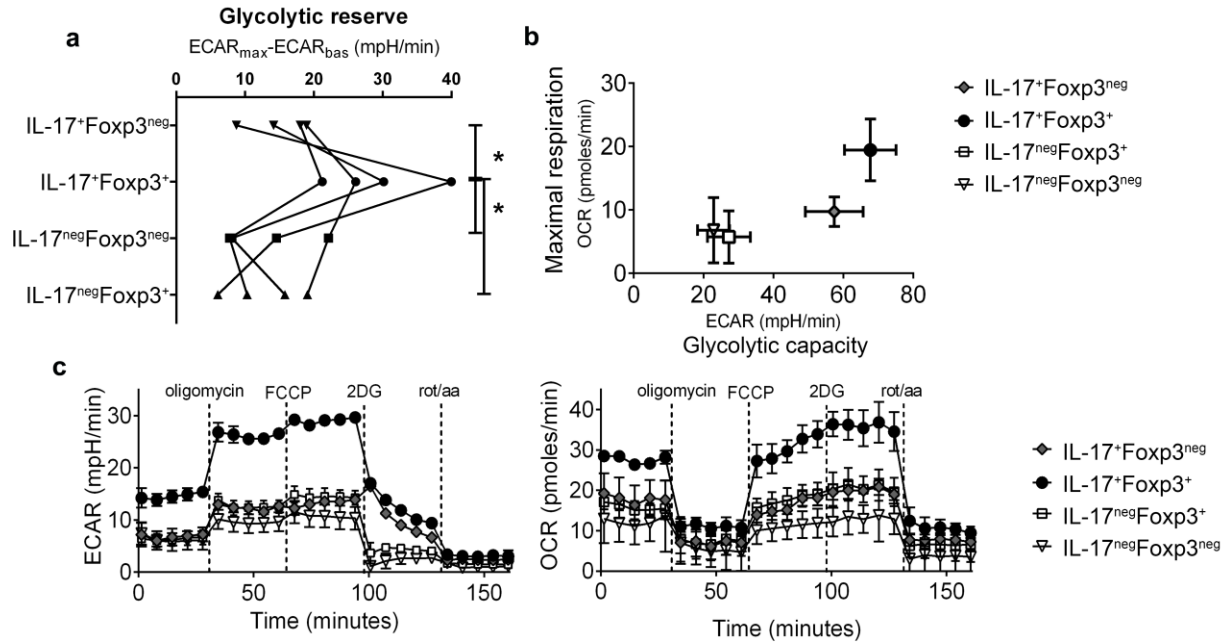

**Supplementary Figure 5. High metabolic activity of immunosuppressive Foxp3<sup>+</sup>IL-17<sup>+</sup> cells.** (a-c) Foxp3<sup>neg</sup>IL-17<sup>+</sup>, Foxp3<sup>+</sup>IL-17<sup>+</sup>, Foxp3<sup>neg</sup>IL-17<sup>neg</sup> and Foxp3<sup>+</sup>IL-17<sup>neg</sup> CD3<sup>+</sup> T cells were sorted using the strategy presented in Fig. 4e and analyzed with XF<sup>c</sup> Extracellular Flux Analyzer. (a) Glycolytic reserve is defined as the difference between the mean basal (ECAR<sub>bas</sub>) and maximal ECAR (ECAR<sub>max</sub>) values. Mean of each real-time run for individual subset was calculated. Cumulative data from 4 independent experiments are evaluated by one-way ANOVA, \**P* < 0.05. (b) Representative data of maximal respiration vs glycolytic capacity of individual Th17-T<sub>reg</sub> subsets (*n* = 4 Foxp3<sup>+</sup>IL-17<sup>+</sup>, *n* = 8 Foxp3<sup>+</sup>IL-17<sup>neg</sup>, *n* = 6 Foxp3<sup>neg</sup>IL-17<sup>+</sup>, *n* = 4 Foxp3<sup>neg</sup>IL-17<sup>neg</sup>). (c) Real-time measurements (mean ± sd) of glycolysis (ECAR, left) and oxidative phosphorylation (OCR, right) in 96-well Seahorse assay plates (approx. 1 × 10<sup>5</sup> cell/well) were carried out as described in Online Methods. Graphs are representative of three independent experiments and show the effects of oligomycin, 2DG, mitochondrial inhibitors FCCP and rotenone, injected as indicated.

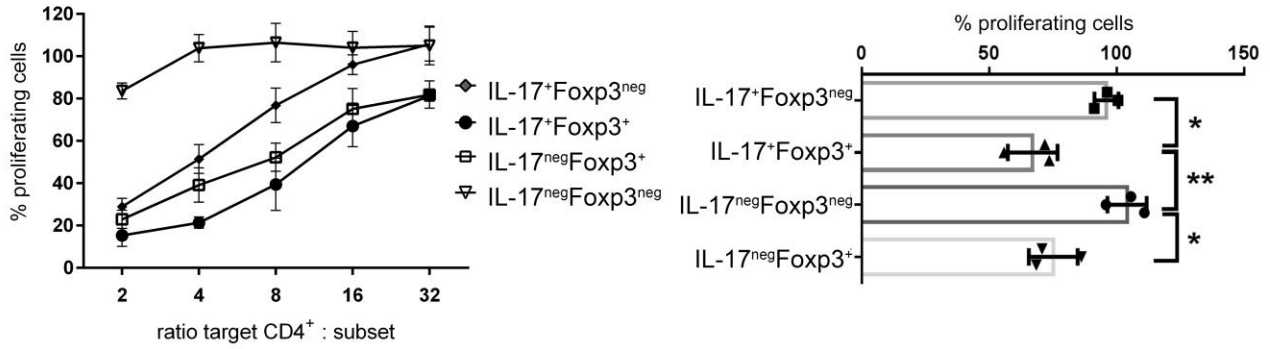

**Supplementary Figure 6. High immunosuppressive activity of IL-17<sup>+</sup>Foxp3<sup>+</sup> cells.**

Foxp3<sup>neg</sup>IL-17<sup>+</sup>, Foxp3<sup>+</sup>IL-17<sup>+</sup>, Foxp3<sup>neg</sup>IL-17<sup>neg</sup> and Foxp3<sup>+</sup>IL-17<sup>neg</sup> CD3<sup>+</sup> Th17-T<sub>reg</sub> subsets were sorted using the strategy presented in **Fig. 3a**. CD4<sup>+</sup> T cells, isolated from Cd45.1 mice and stained with CFSE, were analyzed after 72h stimulation with  $\alpha$ CD3Ab, in the presence of irradiated CD4<sup>neg</sup> fraction and different ratios of Th17-T<sub>reg</sub> subsets. One-way ANOVA of immunosuppressive effects of the plasticity subsets at 1:4 ratio subset:CD4<sup>+</sup> (*right*).

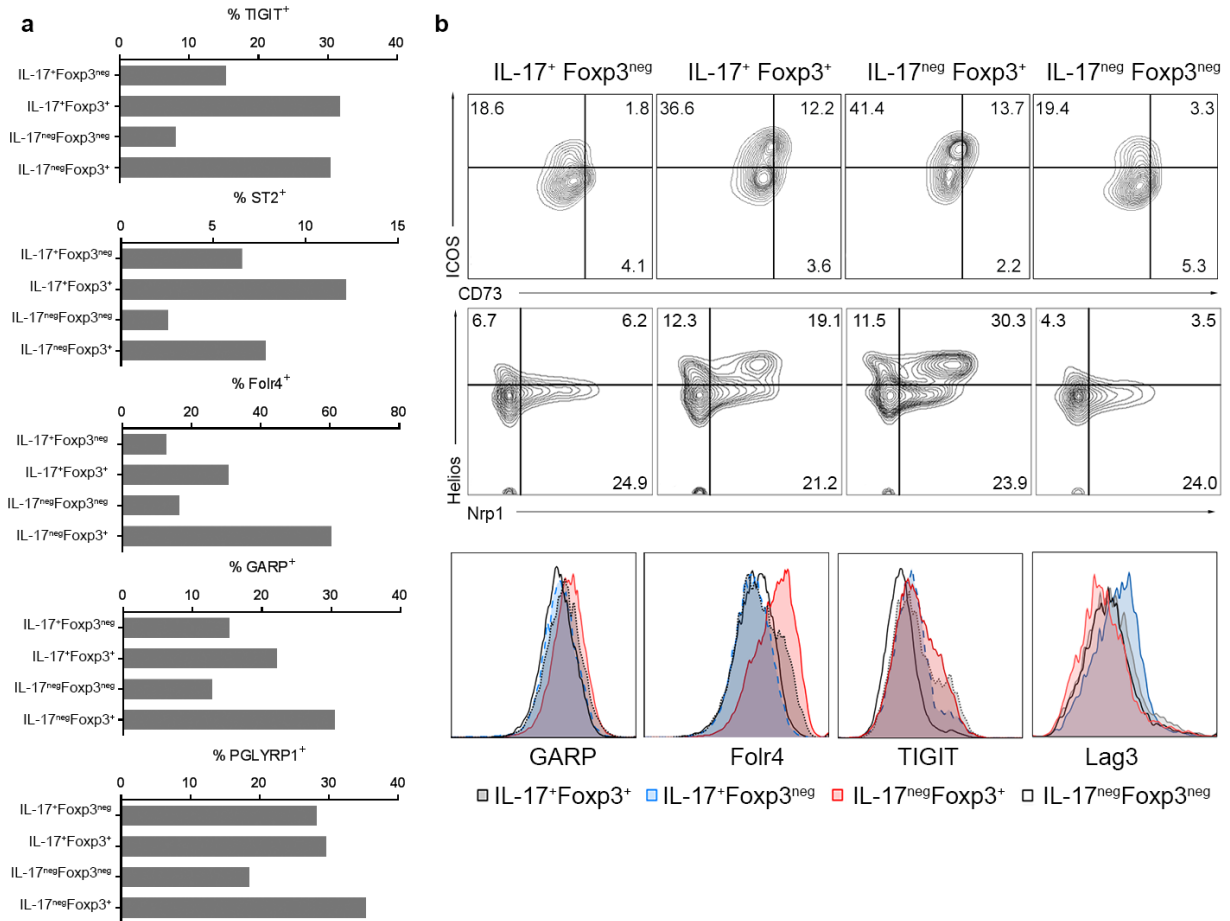

**Supplementary Figure 7. Immunophenotyping of IL-17<sup>+</sup>Foxp3<sup>+/neg</sup> cells.** (a,b) Foxp3<sup>neg</sup>IL-17<sup>+</sup>, Foxp3<sup>+</sup>IL-17<sup>+</sup>, Foxp3<sup>neg</sup>IL-17<sup>neg</sup> and Foxp3<sup>+</sup>IL-17<sup>neg</sup> CD3<sup>+</sup> T cells were sorted using the strategy presented in **Fig. 3a**, stained for respective Th17-T<sub>reg</sub> markers and analyzed by flow cytometry. Percentages of TIGIT<sup>+</sup>, ST2<sup>+</sup>, Folr4<sup>+</sup>, GARP<sup>+</sup> and PGLYRP1<sup>+</sup> cells (a) and representative flow cytometry staining (b) of each Th17-T<sub>reg</sub> subset. Similar data was obtained in an additional independent experiments.



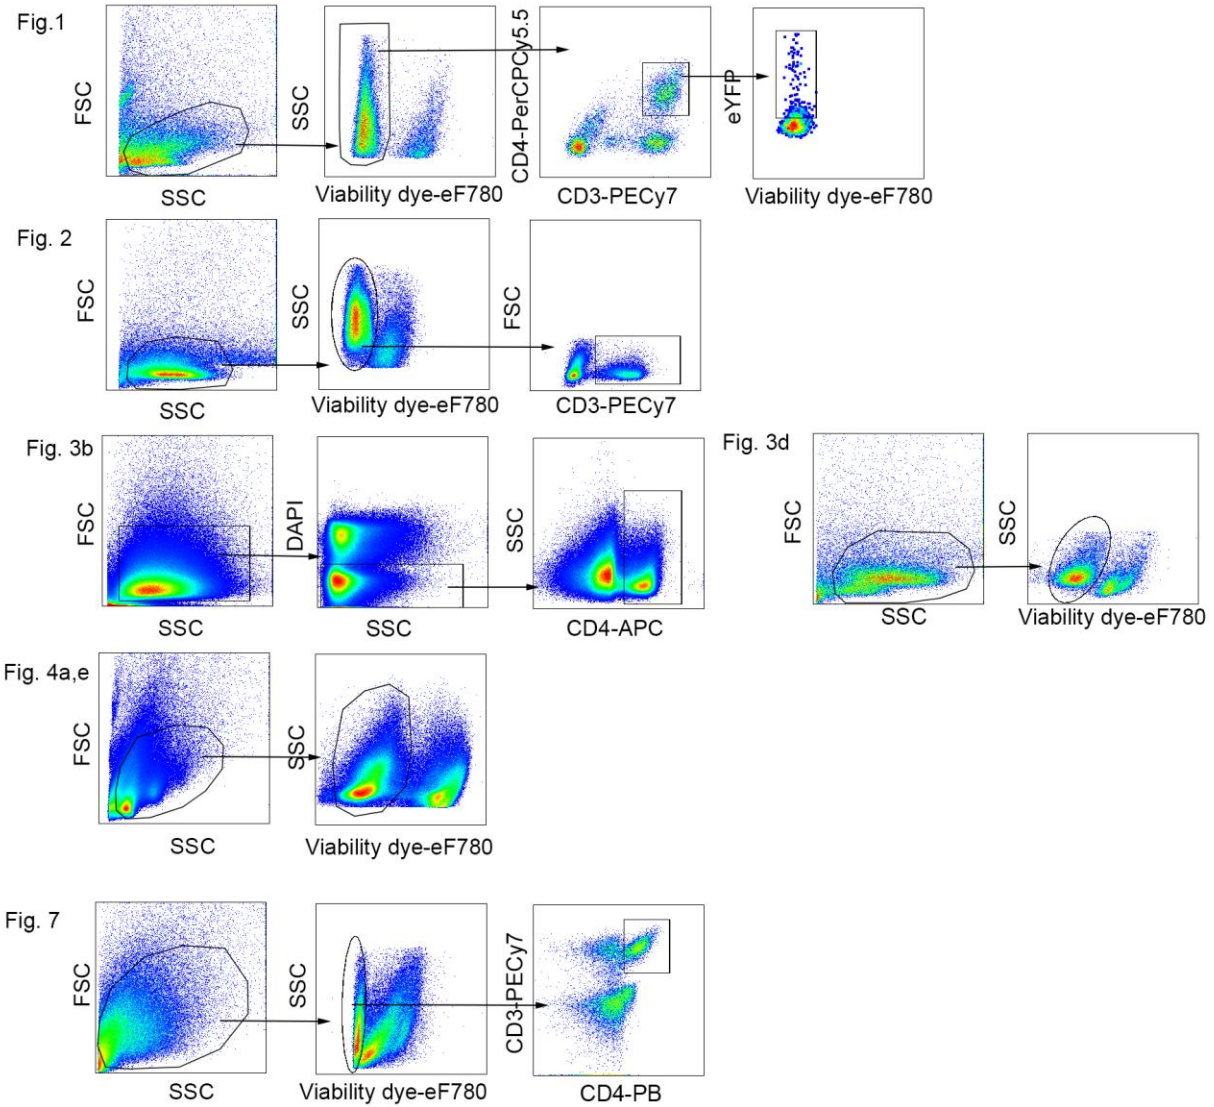

**Supplementary Figure 8. Gating strategy.** The FACS gating strategy of live eYFP<sup>+</sup> CD4<sup>+</sup> T cells presented in **Fig. 1 (a)**, live T cells presented in **Fig. 2 (b)**, live CD4<sup>+</sup> cells presented in **Fig. 3b (c)**, live cells presented in **Fig. 3d (d)**, live cells presented in **Fig. 4a,e (e)** and live CD4<sup>+</sup> T cells presented in **Fig. 7 (f)**.

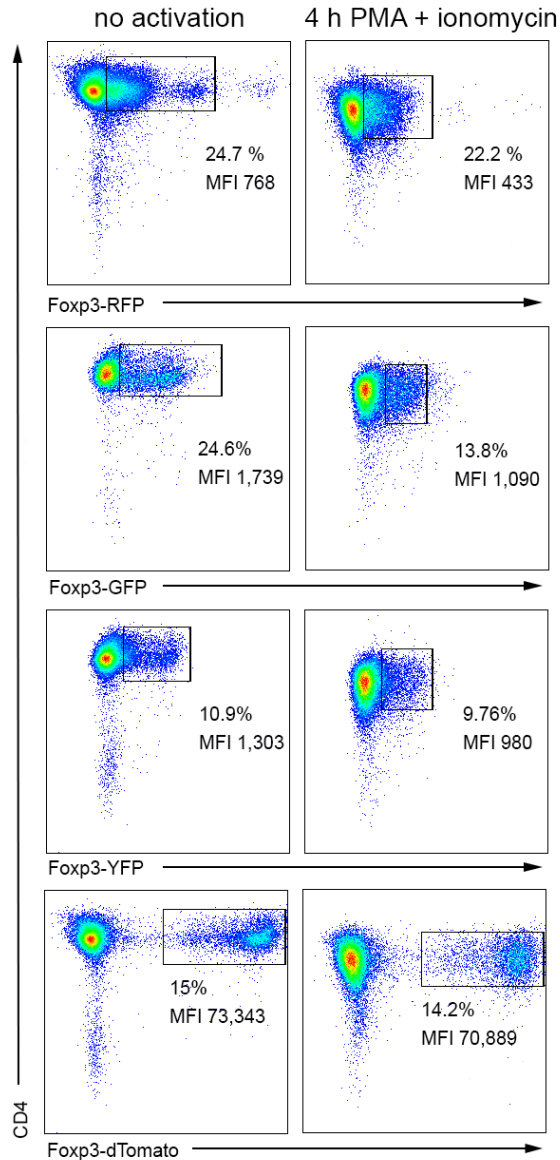

**Supplementary Figure 9. Activation with PMA and ionomycin prior to cell sorting results in a reduced mean fluorescence intensity of Foxp3 reporter signal.** CD4<sup>+</sup> cells were activated with anti-CD3/CD28 microbeads in the presence of irradiated CD4<sup>neg</sup> fraction and 5ng/ml TGF- $\beta$  and analyzed by flow cytometry with or without prior 4 h stimulation with PMA and ionomycin. The activated cells have lower mean fluorescence intensity of the Foxp3 reporter protein mRFP (Foxp3<sup>mRFP</sup> mice), GFP (Foxp3<sup>GFP</sup> mice), YFP and dTomato (Foxp3<sup>YFP/Cre</sup>Rosa26<sup>tdTomato</sup> mice), respectively) following stimulation with PMA and ionomycin. Similar data was obtained in an additional independent experiments.

| Transcript Cluster ID | IL17 <sup>+</sup> Foxp3 <sup>neg</sup> Bi-weight Avg Signal (log2) | IL17 <sup>+</sup> Foxp3 <sup>+</sup> Bi-weight Avg Signal (log2) | Fold Change (linear) | ANOVA p-value | FDR p-value | Gene Symbol | Group      |
|-----------------------|--------------------------------------------------------------------|------------------------------------------------------------------|----------------------|---------------|-------------|-------------|------------|
| TC0X00000058.mm.1     | 5.32                                                               | 10.35                                                            | -32.83               | 0.013334      | 0.815157    | Foxp3       | Complex    |
| TC0900001779.mm.1     | 8.02                                                               | 12.2                                                             | -18.2                | 0.013635      | 0.815157    | Folr4       | Coding     |
| TC0700001368.mm.1     | 5.8                                                                | 9.88                                                             | -16.96               | 0.010621      | 0.815157    | Lrrc32      | Coding     |
| TC0900000113.mm.1     | 5.28                                                               | 9.21                                                             | -15.26               | 0.023053      | 0.815157    | Gpr83       | Complex    |
| TC0100002534.mm.1     | 7.72                                                               | 10.92                                                            | -9.17                | 0.000966      | 0.815157    | Ikzf2       | Complex    |
| TC1200002511.mm.1     | 4.65                                                               | 7.79                                                             | -8.81                | 0.049593      | 0.822847    | Itgb8       | Complex    |
| TC0200001018.mm.1     | 6.55                                                               | 9.2                                                              | -6.29                | 0.045543      | 0.822847    | Myo3b       | Complex    |
| TC0100000298.mm.1     | 5.05                                                               | 7.48                                                             | -5.38                | 0.03197       | 0.815157    | Il1rl1      | Coding     |
| TC0700000275.mm.1     | 6.23                                                               | 8.66                                                             | -5.38                | 0.016924      | 0.815157    | Pglyrp1     | Coding     |
| TC0300000656.mm.1     | 8.01                                                               | 10.3                                                             | -4.87                | 0.020658      | 0.815157    | Tmem154     | Complex    |
| TC1100001015.mm.1     | 10.58                                                              | 12.81                                                            | -4.7                 | 0.021584      | 0.815157    | Itgae       | Coding     |
| TC1600001633.mm.1     | 9.78                                                               | 11.85                                                            | -4.21                | 0.012566      | 0.815157    | Tigit       | Coding     |
| TC1200002542.mm.1     | 14.19                                                              | 16.1                                                             | -3.77                | 0.010202      | 0.815157    | Ighm        | Complex    |
| TC0600003547.mm.1     | 3.65                                                               | 5.49                                                             | -3.57                | 0.010338      | 0.815157    | Igkv4-91    | Coding     |
| TC1600001580.mm.1     | 7.79                                                               | 9.59                                                             | -3.47                | 0.044093      | 0.822847    | Cd86        | Complex    |
| TC0800002310.mm.1     | 5.09                                                               | 6.77                                                             | -3.2                 | 0.015858      | 0.815157    | Cpe         | Complex    |
| TC0200003532.mm.1     | 12.76                                                              | 14.38                                                            | -3.09                | 0.040506      | 0.822847    | Arl5a       | Complex    |
| TC1900000572.mm.1     | 7.32                                                               | 8.91                                                             | -3                   | 0.031331      | 0.815157    | Entpd1      | Complex    |
| TC1000002099.mm.1     | 8.32                                                               | 9.88                                                             | -2.96                | 0.019111      | 0.815157    | Prdm1       | Complex    |
| TC0100000490.mm.1     | 14.17                                                              | 15.71                                                            | -2.91                | 0.018253      | 0.815157    | Icos        | Coding     |
| TC0100000216.mm.1     | 5.71                                                               | 7.22                                                             | -2.85                | 0.02423       | 0.815157    | Dst         | Complex    |
| TC0100003589.mm.1     | 7.06                                                               | 8.55                                                             | -2.8                 | 0.039297      | 0.822847    | Gm4955      | Coding     |
| TC1600001324.mm.1     | 5.46                                                               | 6.92                                                             | -2.76                | 0.038858      | 0.822847    | Iglv1       | Complex    |
| TC0900001675.mm.1     | 9.36                                                               | 10.81                                                            | -2.74                | 0.045643      | 0.822847    | Ccr5        | Complex    |
| TC0400003957.mm.1     | 9.91                                                               | 11.32                                                            | -2.65                | 0.001322      | 0.815157    | Tnfrsf1b    | Complex    |
| TC1100003345.mm.1     | 5.45                                                               | 6.86                                                             | -2.65                | 0.031189      | 0.815157    | Myo1d       | Complex    |
| TC0800002804.mm.1     | 11.01                                                              | 12.4                                                             | -2.61                | 0.034603      | 0.815157    |             | Other      |
| TC1200002626.mm.1     | 3.38                                                               | 4.73                                                             | -2.55                | 0.035149      | 0.815157    | Ighv1-47    | Coding     |
| TC0500002855.mm.1     | 9.43                                                               | 10.77                                                            | -2.53                | 0.027131      | 0.815157    | LOC636711   | Coding     |
| TC1100003680.mm.1     | 10.85                                                              | 12.17                                                            | -2.51                | 0.039594      | 0.822847    | Ikzf3       | Complex    |
| TC0500000934.mm.1     | 10.17                                                              | 11.46                                                            | -2.45                | 0.011954      | 0.815157    | Bmp2k       | Complex    |
| TC0100002844.mm.1     | 7.56                                                               | 8.79                                                             | -2.35                | 0.017411      | 0.815157    | St8sia4     | Coding     |
| TC0700000995.mm.1     | 10.39                                                              | 11.57                                                            | -2.28                | 0.049193      | 0.822847    | Gm10974     | Coding     |
| TC1700000044.mm.1     | 8.69                                                               | 9.85                                                             | -2.24                | 0.034704      | 0.815157    | Snx9        | Complex    |
| TC0300000680.mm.1     | 8.94                                                               | 10.06                                                            | -2.18                | 0.025938      | 0.815157    | Lrba        | Complex    |
| TC0300002123.mm.1     | 11.8                                                               | 12.93                                                            | -2.18                | 0.005385      | 0.815157    | Gm20689     | Complex    |
| TC1200002606.mm.1     | 4.26                                                               | 5.34                                                             | -2.12                | 0.019281      | 0.815157    | Ighv1-11    | Unassigned |
| TC0800000653.mm.1     | 6.46                                                               | 7.54                                                             | -2.11                | 0.014936      | 0.815157    | Sh3rf1      | Coding     |
| TC1000001691.mm.1     | 9.24                                                               | 10.29                                                            | -2.08                | 0.046896      | 0.822847    | Ipcef1      | Complex    |
| TC1200002573.mm.1     | 5.74                                                               | 6.79                                                             | -2.08                | 0.015612      | 0.815157    | Ighv2-9     | Coding     |
| TC1400002781.mm.1     | 8.69                                                               | 9.69                                                             | -2.01                | 0.043903      | 0.822847    | Gm10340     | Complex    |

**Supplementary Table 1. Differentially expressed genes in IL17<sup>+</sup>Foxp3<sup>neg</sup> and IL17<sup>+</sup>Foxp3<sup>+</sup>**

**cells.** The list of genes upregulated in IL17<sup>+</sup>Foxp3<sup>+</sup> compared to IL17<sup>+</sup>Foxp3<sup>neg</sup> cells. The filters applied were ANOVA p<0.05 and linear fold change <-2. The non-coding genes were excluded.

| <b>Transcript<br/>Cluster ID</b> | <b>IL17<sup>+</sup>Foxp3<sup>+</sup><br/>Bi-weight Avg<br/>Signal (log2)</b> | <b>IL17<sup>neg</sup>Foxp3<sup>+</sup><br/>Bi-weight Avg<br/>Signal (log2)</b> | <b>Fold<br/>Change<br/>(linear)</b> | <b>ANOVA<br/>p-value</b> | <b>FDR<br/>p-value</b> | <b>Gene<br/>Symbol</b> | <b>Group</b> |
|----------------------------------|------------------------------------------------------------------------------|--------------------------------------------------------------------------------|-------------------------------------|--------------------------|------------------------|------------------------|--------------|
| TC0600003606.mm.1                | 4.53                                                                         | 7.36                                                                           | -7.1                                | 0.068843                 | 0.932327               | Klrb1b                 | Coding       |
| TC1400000799.mm.1                | 4.1                                                                          | 6.35                                                                           | -4.75                               | 0.020511                 | 0.932327               | Mcpt1                  | Coding       |
| TC0300001616.mm.1                | 5.63                                                                         | 7.59                                                                           | -3.9                                | 0.083915                 | 0.932327               | Hey1                   | Coding       |
| TC1500001828.mm.1                | 5.24                                                                         | 7.07                                                                           | -3.57                               | 0.01557                  | 0.932327               | Csf2rb2                | Complex      |
| TC1600000553.mm.1                | 8.28                                                                         | 10.09                                                                          | -3.51                               | 0.082335                 | 0.932327               | Cd80                   | Complex      |
| TC1300000144.mm.1                | 7.76                                                                         | 9.56                                                                           | -3.48                               | 0.014222                 | 0.932327               | Tcrg-C3                | Coding       |
| TC1300002762.mm.1                | 8.79                                                                         | 10.51                                                                          | -3.28                               | 0.010034                 | 0.932327               | Tcrg-V4                | Complex      |
| TC1400000040.mm.1                | 9.7                                                                          | 11.26                                                                          | -2.94                               | 0.035491                 | 0.932327               | Gm3317                 | Complex      |
| TC0800000676.mm.1                | 8.96                                                                         | 10.48                                                                          | -2.89                               | 0.027532                 | 0.932327               | Gm10663                | Coding       |
| TC1400000030.mm.1                | 9.09                                                                         | 10.58                                                                          | -2.79                               | 0.061513                 | 0.932327               | Gm3239                 | Coding       |
| TC0700002139.mm.1                | 3.85                                                                         | 5.28                                                                           | -2.69                               | 0.013411                 | 0.932327               | Gm15925                | Pseudogene   |
| TC0900000720.mm.1                | 7.72                                                                         | 9.14                                                                           | -2.68                               | 0.014858                 | 0.932327               | Sema7a                 | Complex      |
| TC0900000240.mm.1                | 9.8                                                                          | 11.17                                                                          | -2.59                               | 0.077555                 | 0.932327               | Gm10181                | Coding       |
| TC1000001786.mm.1                | 4.71                                                                         | 6.07                                                                           | -2.56                               | 0.078135                 | 0.932327               | Gpr126                 | Complex      |
| TC0100002552.mm.1                | 4.19                                                                         | 5.52                                                                           | -2.51                               | 0.038213                 | 0.932327               | Mreg                   | Coding       |
| TC1500000641.mm.1                | 5.11                                                                         | 6.43                                                                           | -2.5                                | 0.001263                 | 0.863213               | Csf2rb                 | Complex      |
| TC1100003097.mm.1                | 5.18                                                                         | 6.49                                                                           | -2.48                               | 0.01681                  | 0.932327               | Cxcl16                 | Complex      |
| TC1300000364.mm.1                | 5.12                                                                         | 6.43                                                                           | -2.48                               | 0.0425                   | 0.932327               | Serpinb9               | Coding       |
| TC1200001660.mm.1                | 4.09                                                                         | 5.36                                                                           | -2.41                               | 0.046271                 | 0.932327               | Scin                   | Coding       |
| TC0100000509.mm.1                | 4.55                                                                         | 5.78                                                                           | -2.36                               | 0.077042                 | 0.932327               | Nrp2                   | Complex      |
| TC0700004632.mm.1                | 4.42                                                                         | 5.63                                                                           | -2.32                               | 0.064539                 | 0.932327               | Pir1                   | Complex      |
| TC1200002572.mm.1                | 4.51                                                                         | 5.71                                                                           | -2.3                                | 0.009091                 | 0.932327               | Ighv5-17               | Coding       |
| TC0300000807.mm.1                | 7.54                                                                         | 8.74                                                                           | -2.3                                | 0.069762                 | 0.932327               | S100a4                 | Complex      |
| TC0600001369.mm.1                | 7.48                                                                         | 8.69                                                                           | -2.3                                | 0.065269                 | 0.932327               | Usp18                  | Coding       |
| TC1400002851.mm.1                | 9.18                                                                         | 10.37                                                                          | -2.28                               | 0.072272                 | 0.932327               | Gm3739                 | Complex      |
| TC0700004634.mm.1                | 4.42                                                                         | 5.6                                                                            | -2.27                               | 0.055745                 | 0.932327               | Gm14548                | Coding       |
| TC1400002845.mm.1                | 9.61                                                                         | 10.77                                                                          | -2.24                               | 0.046524                 | 0.932327               | Gm3629                 | Coding       |
| TC0700002087.mm.1                | 10.86                                                                        | 12.01                                                                          | -2.22                               | 0.070881                 | 0.932327               | Tspan32                | Complex      |
| TC1000001625.mm.1                | 7.49                                                                         | 8.63                                                                           | -2.21                               | 0.06409                  | 0.932327               | Cd63                   | Coding       |
| TC0300002482.mm.1                | 6.95                                                                         | 8.09                                                                           | -2.2                                | 0.0223                   | 0.932327               | Ecm1                   | Complex      |
| TC0900001048.mm.1                | 5.2                                                                          | 6.33                                                                           | -2.19                               | 0.041569                 | 0.932327               | Gsta4                  | Complex      |
| TC1800000510.mm.1                | 7.88                                                                         | 9.01                                                                           | -2.19                               | 0.020736                 | 0.932327               | Cd63-ps                | Pseudogene   |
| TC1400000046.mm.1                | 9.83                                                                         | 10.95                                                                          | -2.17                               | 0.075524                 | 0.932327               | Gm3488                 | Complex      |
| TC0500000928.mm.1                | 4.78                                                                         | 5.85                                                                           | -2.11                               | 0.024857                 | 0.932327               | Anxa3                  | Coding       |
| TC1600000479.mm.1                | 5.59                                                                         | 6.62                                                                           | -2.04                               | 0.074893                 | 0.932327               | Muc13                  | Coding       |
| TC0900001824.mm.1                | 3.45                                                                         | 4.49                                                                           | -2.04                               | 0.091642                 | 0.932327               | Olfir860               | Coding       |
| TC1500000982.mm.1                | 7.18                                                                         | 8.2                                                                            | -2.03                               | 0.047668                 | 0.932327               | Cacnb3                 | Coding       |
| TC0500000843.mm.1                | 4.77                                                                         | 5.79                                                                           | -2.03                               | 0.075706                 | 0.932327               | Pf4                    | Coding       |
| TC1400002792.mm.1                | 10.06                                                                        | 11.07                                                                          | -2.02                               | 0.090881                 | 0.932327               | Gm3252                 | Coding       |
| TC0700003485.mm.1                | 8.53                                                                         | 7.52                                                                           | 2.02                                | 0.039077                 | 0.932327               | Mctp2                  | Complex      |
| TC0X00002316.mm.1                | 8.39                                                                         | 7.36                                                                           | 2.03                                | 0.057587                 | 0.932327               | Gm8163                 | Pseudogene   |
| TC1000001141.mm.1                | 10.09                                                                        | 8.99                                                                           | 2.15                                | 0.039393                 | 0.932327               | Gm3571                 | Pseudogene   |
| TC0500003479.mm.1                | 8.73                                                                         | 7.62                                                                           | 2.15                                | 0.059527                 | 0.932327               | Got2-ps1               | Pseudogene   |
| TC1900001510.mm.1                | 9.25                                                                         | 8.08                                                                           | 2.25                                | 0.036734                 | 0.932327               | Arhgap19               | Coding       |
| TC0X00002996.mm.1                | 5.25                                                                         | 4.07                                                                           | 2.27                                | 0.040605                 | 0.932327               | Gm7855                 | Pseudogene   |
| TC0800000424.mm.1                | 7.25                                                                         | 5.94                                                                           | 2.49                                | 0.081573                 | 0.932327               | Ppp1r3b                | Complex      |

**Supplementary Table 2. Differentially expressed genes in IL17<sup>+</sup>Foxp3<sup>+</sup> and IL17<sup>neg</sup>Foxp3<sup>+</sup> cells.** The list of genes upregulated in IL17<sup>neg</sup>Foxp3<sup>+</sup> compared to IL17<sup>+</sup>Foxp3<sup>+</sup> cells. The filters applied were ANOVA  $p < 0.05$  and linear fold change  $< -2$ . The non-coding genes were excluded.
